# Supplementary material
Source: PubMed Central journal article supplement (PMC6118067)
Supplement: kwy092_lesko_web_material_final.pdf [file kwy092_lesko_web_material_final.pdf]

## Web Material

### Measurement of Current Substance Use in a Cohort of HIV-Infected Persons in Continuity HIV Care, 2007–2015

Catherine R. Lesko, Alexander P. Keil, Richard D. Moore, Geetanjali Chander, Anthony T. Fojo,  
and Bryan Lau

#### Web Appendix 1

##### JAGS code

###### Code for Model 1

```
#### order variables in dataset y:
# 1. MRR result
# 2. SI result
# 3. Demographic group
#### other variables in the model:
# d is latent indicator of true substance use that has probability pd
# G is number of groups, where g indexes group membership
# N is number of study participants indexed by i
# assessments are indexed by j (MRR=1, SI=2)
# a[j,1], s[i,j] are test sensitivity
# a[j,2], c[i,j] are test specificity

model {
  prev <- mean(d) # calculate prevalence within JAGS
  for (g in 1:G) {
    a_prev[g]~dunif(0,1)
  }
  for (i in 1:N) {
    for (j in 1:2) {
      y[i,j]~dbern(p[i,j]) #response on test j, 1=MRR, 2=SI
      p[i,j]<-(s[i,j]^d[i])*(1-c[i,j])^(1-d[i])
    }
    d[i]~dbern(pd[i])
    pd[i]<-a_prev[y[i,3]]
  }
}
```

```

s[i,1]<-a[1,1]
c[i,1]<-a[1,2]
s[i,2]<-a[2,1]
c[i,2]<-a[2,2]
}
#priors
a[1,1]~dunif(0,1) #sens MRR
a[2,1]~dunif(0,1) #sens SI
a[1,2]~dbeta(90,10) #spec MMR
a[2,2]~dbeta(95,5) #spec SI
}

```

### Code for Model 2

```

#### order variables in dataset y:
# 1. MRR result
# 2. SI result
# 3. Demographic group
#### other variables in the model:
# d is latent indicator of true substance use that has probability pd
# G is number of groups, where g indexes group membership
# N is number of study participants indexed by i
# assessments are indexed by j (MRR=1, SI=2)
# a[1,g] is sensitivity of MRR for group g
# a[2,1] is specificity of MRR assumed constant across groups
# b[1,g] is sensitivity of SI for group g
# b[2,1] is specificity of SI assumed constant across groups

model {
  prev <- mean(d) # calculate prevalence within JAGS
  for (g in 1:G) {
    a_prev[g]~dunif(0,1)
    a[1,g]~dunif(0,1) #sens MRR
    b[1,g]~dunif(0,1) #sens self-report
  }
  a[2,1]~dbeta(90,10) #spec MRR, non IDU
  b[2,1]~dbeta(95,5) #spec self-report, non IDU
  for (i in 1:N) {
    for (j in 1:2) {
      y[i,j]~dbern(p[i,j]) #response on test j, 1=MRR, 2=SI
      p[i,j]<-(s[i,j]^d[i])*(1-c[i,j])^(1-d[i])
    }
    d[i]~dbern(pd[i])
    pd[i]<-a_prev[y[i,3]]
    s[i,1]<-a[1,y[i,3]] #sensitivity, MRR, per group
  }
}

```

```

c[i,1]<-a[2,1] #specificity, assumed equal across groups
s[i,2]<-b[1,y[i,3]] #sensitivity, SI, per group
c[i,2]<-b[2,1] #specificity assumed equal across groups
}
}

```

### Code for Model 3

```

### dataset includes:
# 1. MRR result (t1)
# 2. SI result (t2)
# 3. Demographic group (g)
### other variables in the model:
# N is number of study participants indexed by i
# G is number of groups, where g indexes group membership
# s is sensitivity of MRR and SI
# c is specificity of MRR and SI
# prev (indexed by G) is group-specific prevalence
# covu is unrestricted covariance – in transformed parameters block, covariance is restricted to
# feasible range based on sensitivities
# cov is covariance, restricted to fall between ls and us based on sensitivity estimates

```

```

model <- "
data{
  int<lower=0> N;
  int<lower=0> G;
  int<lower=0,upper=G> g[N];
  int<lower=0,upper=1> t1[N];
  int<lower=0,upper=1> t2[N];
}
transformed data{
  int<lower=0,upper=1> tpat[N,4];
  for(i in 1:N){
    for(k in 1:4){
      tpat[i,k] = 0;
    }
    if(t1[i]==1 && t2[i]==1) tpat[i,1] = 1;
    if(t1[i]==1 && t2[i]==0) tpat[i,2] = 1;
    if(t1[i]==0 && t2[i]==1) tpat[i,3] = 1;
    if(t1[i]==0 && t2[i]==0) tpat[i,4] = 1;
  }
}
parameters{
  real<lower=0,upper=1> s[2];
  real<lower=0,upper=1> c[2];

```

```

real<lower=0,upper=1> prev[G];
real<lower=0,upper=1> covu; //unrestricted covariance - in transformed parameters, will be
restricted to feasible range based on sensitivities
}
transformed parameters{
simplex[4] prob0[G];
simplex[4] prob1[G];
real cov;
real ls;
real us;
ls = 0;
us = (min(s)-s[1]*s[2]);
cov = covu*(us-ls) + ls; //I think this scales the covariance to force it to be in feasible range
for(j in 1:G){
// probability of test result, given you are a case
prob1[j,1] = (s[1]*s[2] + cov) ; // 1,1
prob1[j,2] = (s[1]*(1-s[2]) - cov) ; // 1,0
prob1[j,3] = (s[2]*(1-s[1]) - cov) ; // 0,1
prob1[j,4] = ((1-s[1])*(1-s[2]) + cov) ; // 0,0
// probability of test result, given you are not a case
prob0[j,1] = ((1-c[1])*(1-c[2]) ); // 1,1
prob0[j,2] = ((1-c[1])*c[2] ); // 1,0
prob0[j,3] = (c[1] *(1-c[2]) ); // 0,1
prob0[j,4] = (c[1] *c[2] ); // 0,0
}
}
model{
s~beta(1,1);
c[1]~beta(90,10);
c[2]~beta(95,5);
prev~beta(1,7);
covu ~ uniform(0,1);
for(i in 1:N){
tpat[i] ~ multinomial(prob1[g[i]]*prev[g[i]] + prob0[g[i]]*(1-prev[g[i]]));
}
}
generated quantities{
real prev_overall=0;
for(i in 1:N){
prev_overall = prev_overall + prev[g[i]]/N;
}
}
"

```

Web Table 1. Estimated prevalence of current substance use (overall and by subgroup), and estimated sensitivity and specificity of medical record review (MRR) and self-interview (SI) for detecting current substance use, in 2,064 persons in the Johns Hopkins HIV Clinical Cohort, 2007-2015, assuming exchangeable specificity, but sensitivity of MRR and SI and prevalence of substance use vary across subgroups (full model 2 results)

|                         |       |        |                   | Cocaine           | Heroin            | Alcohol           | Hazardous Alcohol | Cigarettes        |
|-------------------------|-------|--------|-------------------|-------------------|-------------------|-------------------|-------------------|-------------------|
| <b>Cocaine</b>          |       |        |                   |                   |                   |                   |                   |                   |
| <b>Sensitivity, MRR</b> |       |        |                   |                   |                   |                   |                   |                   |
| IDU                     | Black | <45yrs | Male              |                   |                   |                   |                   |                   |
| Y                       | Y     | Y      | Y                 | 38.1 (13.4, 72.9) | 53.8 (26.8, 81.7) | 59.6 (32.4, 88.5) | 59.6 (32.4, 88.5) | 77.2 (60.9, 89.7) |
|                         |       |        | N                 | 87.9 (49.9, 99.5) | 42.8 (15.8, 81.8) | 61.1 (27.0, 96.7) | 61.1 (27.0, 96.7) | 78.2 (62.9, 90.1) |
| N                       | N     | N      | Y                 | 70.6 (50.4, 91.5) | 76.0 (57.0, 92.4) | 59.9 (49.3, 73.0) | 59.9 (49.3, 73.0) | 79.1 (73.1, 84.7) |
|                         |       |        | N                 | 77.3 (48.2, 97.7) | 78.1 (36.5, 98.8) | 57.4 (32.4, 92.5) | 57.4 (32.4, 92.5) | 74.4 (64.0, 83.6) |
|                         |       | Y      | Y                 | 57.7 (14.2, 96.1) | 64.3 (12.6, 98.4) | 76.1 (36.1, 98.7) | 76.1 (36.1, 98.7) | 62.0 (37.0, 83.9) |
|                         |       |        | N                 | 69.8 (29.4, 97.6) | 66.9 (25.6, 96.3) | 55.0 (18.8, 95.6) | 55.0 (18.8, 95.6) | 89.7 (74.2, 97.8) |
|                         | N     | Y      | Y                 | 19.1 (0.8, 88.1)  | 31.4 (3.7, 83.9)  | 64.6 (31.4, 95.6) | 64.6 (31.4, 95.6) | 62.2 (41.9, 81.1) |
|                         |       |        | N                 | 62.9 (18.8, 97.3) | 65.1 (13.0, 98.4) | 54.9 (26.7, 85.8) | 54.9 (26.7, 85.8) | 71.3 (52.9, 86.2) |
|                         |       |        | Y                 | 75.1 (32.7, 98.8) | 68.3 (22.8, 98.2) | 35.0 (27.7, 43.0) | 35.0 (27.7, 43.0) | 67.4 (57.1, 78.2) |
|                         |       |        | N                 | 65.4 (32.8, 96.2) | 75.8 (23.0, 99.0) | 30.2 (19.7, 42.8) | 30.2 (19.7, 42.8) | 81.1 (67.2, 95.8) |
| N                       | N     | Y      | 64.7 (36.6, 95.0) | 83.9 (48.2, 99.2) | 53.1 (43.9, 63.6) | 53.1 (43.9, 63.6) | 76.6 (68.1, 85.5) |                   |
|                         |       | N      | 88.7 (60.2, 99.5) | 68.3 (23.6, 98.1) | 42.8 (29.9, 59.4) | 42.8 (29.9, 59.4) | 88.2 (77.3, 98.4) |                   |
|                         |       | Y      | 55.7 (16.6, 95.4) | 31.5 (0.6, 95.6)  | 42.4 (30.5, 56.1) | 42.4 (30.5, 56.1) | 60.0 (41.8, 78.6) |                   |
|                         |       | N      | 32.0 (2.0, 94.3)  | 33.3 (0.9, 95.8)  | 20.3 (7.4, 40.8)  | 20.3 (7.4, 40.8)  | 85.0 (55.6, 99.1) |                   |
| N                       | N     | Y      | 21.8 (0.8, 92.2)  | 22.3 (0.3, 93.3)  | 31.5 (21.6, 43.1) | 31.5 (21.6, 43.1) | 74.7 (64.0, 83.6) |                   |
|                         |       | N      | 31.2 (0.8, 95.7)  | 32.8 (0.9, 95.8)  | 27.2 (10.0, 54.3) | 27.2 (10.0, 54.3) | 74.0 (42.6, 96.9) |                   |
| <b>Sensitivity, SI</b>  |       |        |                   |                   |                   |                   |                   |                   |
| IDU                     | Black | <45yrs | Male              |                   |                   |                   |                   |                   |
| Y                       | Y     | Y      | Y                 | 55.4 (21.0, 93.6) | 45.3 (21.1, 73.8) | 86.1 (53.7, 99.3) | 86.1 (53.7, 99.3) | 88.9 (73.5, 98.2) |
|                         |       |        | N                 | 33.6 (13.1, 61.0) | 25.1 (7.7, 57.7)  | 38.9 (15.4, 79.1) | 38.9 (15.4, 79.1) | 81.2 (65.7, 93.2) |
| N                       | N     | N      | Y                 | 32.5 (21.5, 45.5) | 34.4 (23.1, 47.3) | 74.6 (61.9, 90.0) | 74.6 (61.9, 90.0) | 87.2 (81.2, 92.7) |
|                         |       |        | N                 | 46.1 (25.6, 70.0) | 28.7 (9.8, 57.1)  | 48.5 (26.9, 78.9) | 48.5 (26.9, 78.9) | 80.2 (69.4, 89.3) |
|                         |       | Y      | Y                 | 74.8 (23.3, 99.0) | 44.6 (6.1, 94.5)  | 57.9 (2.29, 93.8) | 57.9 (22.9, 93.8) | 93.2 (71.6, 99.7) |
|                         |       |        | N                 |                   |                   |                   |                   |                   |

|                  |   |   |                   |                   |                   |                   |                   |
|------------------|---|---|-------------------|-------------------|-------------------|-------------------|-------------------|
|                  |   | N | 42.4 (14.1, 79.8) | 56.9 (19.6, 92.6) | 57.1 (19.4, 96.3) | 57.1 (19.4, 96.3) | 89.9 (74.1, 98.0) |
|                  | N | Y | 35.7 (2.6, 95.4)  | 65.4 (12.9, 98.4) | 83.5 (46.1, 99.2) | 83.5 (46.1, 99.2) | 85.3 (62.1, 98.7) |
|                  |   | N | 42.4 (10.2, 89.0) | 34.1 (4.1, 89.5)  | 86.0 (50.8, 99.4) | 86.0 (50.8, 99.4) | 89.3 (73.3, 98.4) |
| N                | Y | Y | 72.7 (29.8, 98.6) | 61.1 (17.8, 97.7) | 81.7 (67.5, 95.8) | 81.7 (67.5, 95.8) | 83.6 (71.3, 96.4) |
|                  |   | N | 61.8 (29.2, 95.8) | 37.7 (6.8, 91.6)  | 87.0 (59.8, 99.4) | 87.0 (59.8, 99.4) | 92.0 (77.4, 99.6) |
|                  |   | N | 84.0 (51.2, 99.3) | 87.9 (53.3, 99.5) | 74.2 (62.1, 98.4) | 74.2 (62.1, 88.1) | 87.6 (78.1, 97.1) |
|                  |   | N | 77.4 (45.7, 98.6) | 47.1 (12.7, 94.4) | 63.9 (44.2, 90.6) | 63.9 (44.2, 90.6) | 80.0 (68.6, 92.2) |
|                  | N | Y | 70.8 (23.6, 98.5) | 31.3 (0.6, 95.7)  | 71.0 (55.9, 88.0) | 71.0 (55.9, 88.0) | 87.1 (64.3, 99.3) |
|                  |   | N | 24.5 (1.1, 92.1)  | 33.1 (0.9, 95.9)  | 80.2 (51.5, 99.0) | 80.2 (51.5, 99.0) | 82.8 (52.2, 98.9) |
|                  |   | N | 24.3 (1.0, 93.5)  | 32.2 (0.7, 95.8)  | 82.4 (61.2, 98.4) | 82.4 (61.2, 98.4) | 76.3 (57.6, 95.4) |
|                  |   | N | 31.1 (0.7, 95.7)  | 33.1 (0.9, 95.8)  | 65.0 (35.7, 97.1) | 65.0 (35.7, 97.1) | 71.1 (39.4, 96.7) |
| Specificity, MRR |   |   | 97.0 (95.9, 98.1) | 98.4 (97.5, 99.1) | 90.9 (86.9, 94.6) | 95.4 (93.5, 97.1) | 90.4 (86.4, 94.4) |
| Specificity, SI  |   |   | 98.3 (97.3, 99.2) | 99.4 (98.8, 99.7) | 92.3 (86.2, 97.0) | 94.1 (91.3, 97.3) | 93.9 (88.9, 97.7) |
| Prevalence       |   |   | 12.4 (10.0, 16.4) | 9.7 (7.8, 14.5)   | 51.3 (44.0, 58.2) | 23.0 (17.1, 31.6) | 54.7 (50.5, 58.5) |

Abbreviations: IDU, injection drug use (as an HIV-acquisition risk factor); MRR, medical record review; SI, self-interview
